# Supplementary material
Source: PubMed Central journal article supplement (PMC3877820)
Supplement: supp_tpc.113.118174_tpc118174_Supplemental_Data.pdf [file supp_tpc.113.118174_tpc118174_Supplemental_Data.pdf]

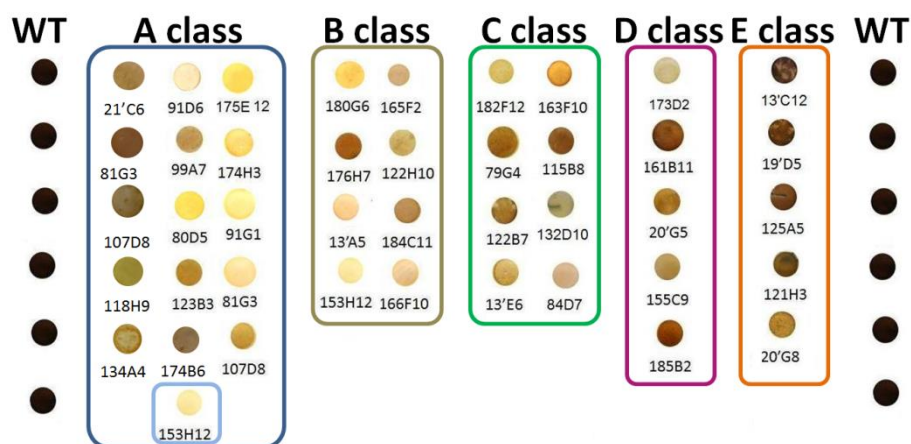

**Supplemental figure 1: Cells patches of the five classes of mutant of *Cyanobacterium* sp. CLg1 stained with iodine vapors.**

Mutants are grouped according to the percentage of residual water-soluble polysaccharides and starch-like granules measured in the mutant strains in comparison to the wild type strain (WT). Class A mutants (starch-like granule < 100% ; WSP >100 %). The mutant strain 153H12 harbors a yellow phenotype despite the presence of 10 % of starch-like granules (blue square). The intermediate phenotype class B mutants (starch-like granule < 100% ; WSP <100 %); class C (starch-like granule < 100% ; WSP = 100 %); class D mutants (starch-like granule = 100% ; WSP <100 %); Class E mutants (starch-like granule >100% ; WSP <100 %).

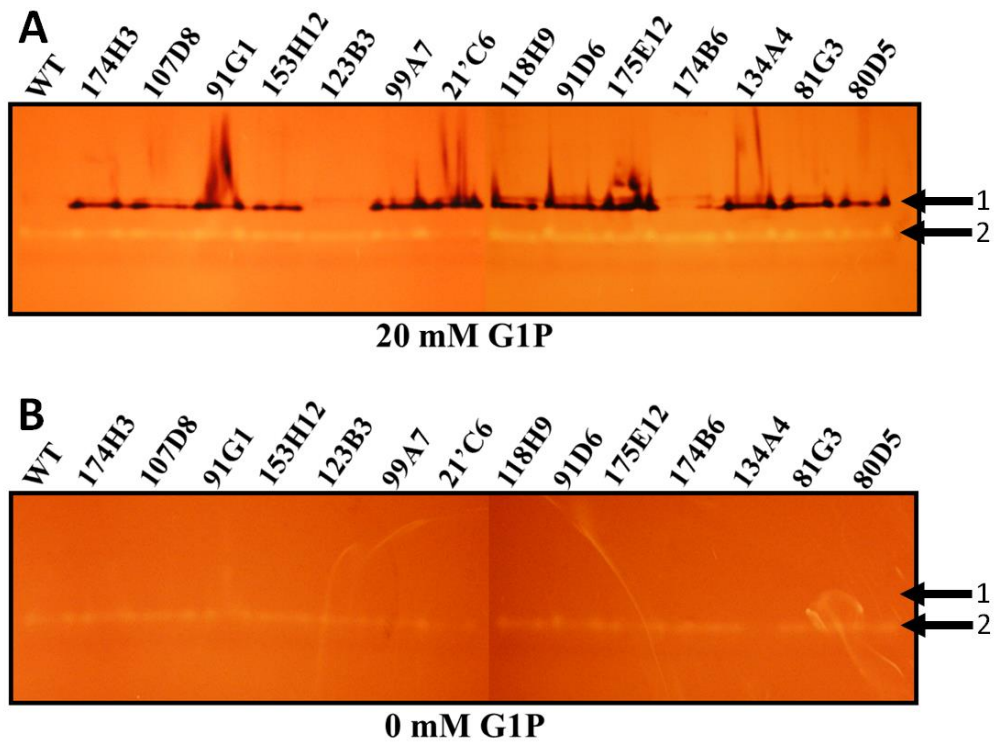

**Supplemental figure 2: Zymogram of phosphorylase activity.**

Zymogram analysis of phosphorylase activity from wild type and class A mutants. Total protein of WT and class A mutant strains were equilibrated and separated by native PAGE, followed by transfer of proteins to a native PAGE containing 0.6% (w/v) of glycogen. The native gels were then incubated with (A) or without (B) 20 mM Glucose-1-Phosphate (G-1-P). After overnight of incubation, gels are stained with iodine solution. Phosphorylase activity (arrow #1) is induced in all class A mutants, except for 174B6, 123B3 mutants and WT strain. A hydrolytic activity (arrow#2) is present in all crude extracts.

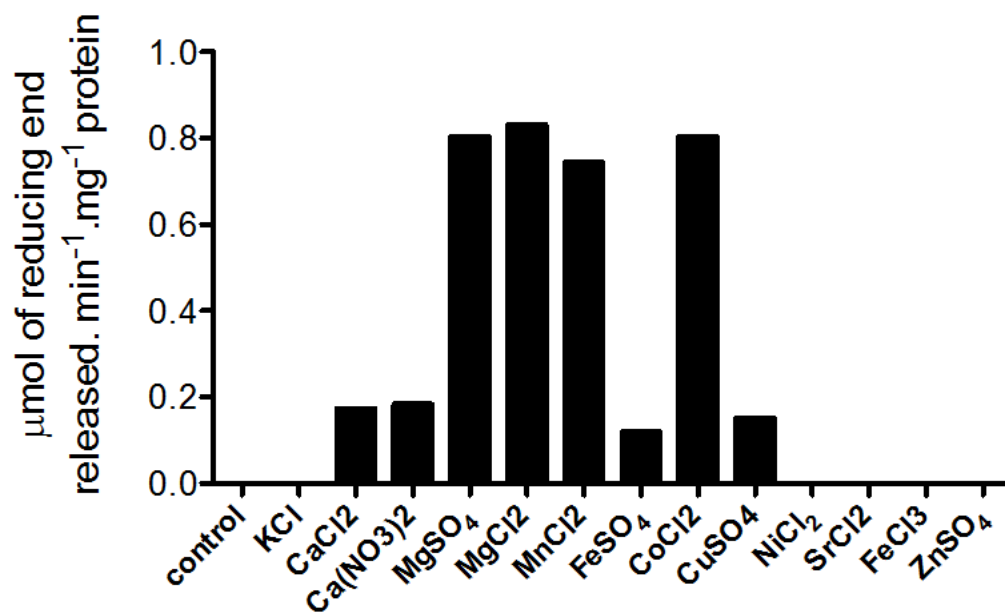

**Supplemental figure 3: Effect of cations on the debranching enzyme activity.**

Cation free debranching enzyme was incubated in absence (control) or in the presence of 5 mM of  $\text{K}^+$ ,  $\text{Ca}^{2+}$ ,  $\text{Mg}^{2+}$ ,  $\text{Mn}^{2+}$ ,  $\text{Fe}^{2+}$ ,  $\text{Co}^{2+}$ ,  $\text{Cu}^{2+}$ ,  $\text{Ni}^{2+}$ ,  $\text{Sr}^{2+}$ ,  $\text{Fe}^{3+}$ ,  $\text{Zn}^{2+}$  and 0,2% of amylopectin at 30°C during 30 minutes. Reactions were stopped by adding a volume of sodium 3,5-dinitrosalicylate (DNS) and boiled 10 minutes at 99°C. After cooling down, the absorbance is measured at 540 nm. The specific activity ( $\mu\text{mol of reducing end} \cdot \text{min}^{-1} \cdot \text{mg}^{-1} \text{ protein}$ ) was determined in presence of each cation.

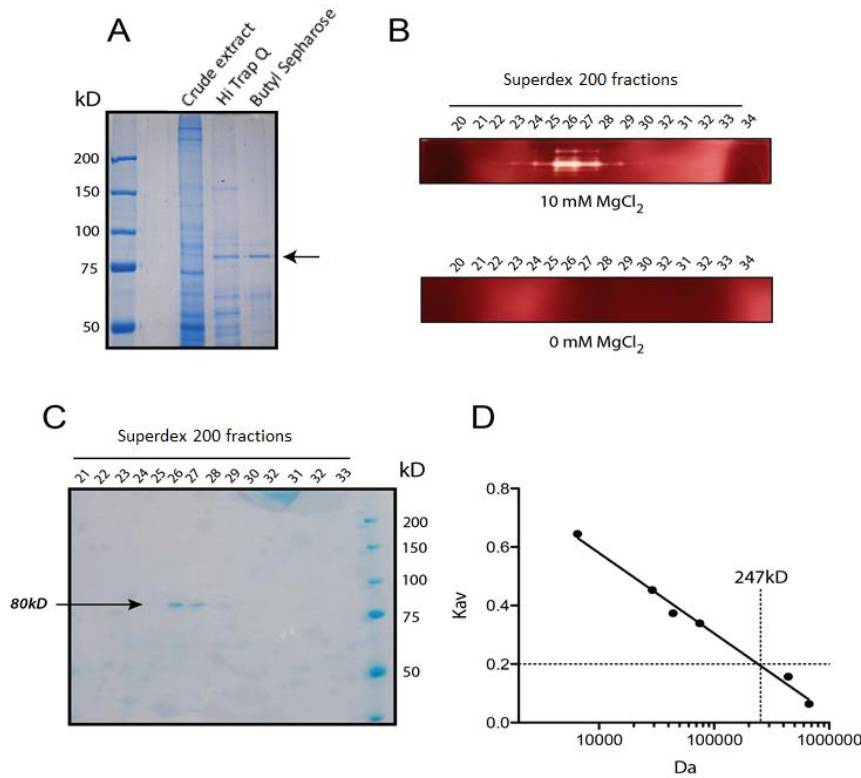

**Supplemental figure 4: Purification of cation dependent debranching enzyme activity.**

**A.** Cation dependent activity was purified at homogeneity using an anion exchange chromatography (HitrapQ), hydrophobic column (butyl sepharose) and gel permeation chromatography (superdex 200). The enrichment in GlgX2 protein is followed on SDS-PAGE after each purification step (black arrow). **B.** Debranching enzyme activity was monitored by using zymogram analysis performed in presence or in absence of 10 mM of  $MgCl_2$  during the purification steps. **C.** SDS-PAGE analysis performed on superdex 200 fractions. A polypeptide of weight of 80 kD is visualized in fractions # 26 and #27 after Coomassie blue staining. **D.** Superdex 200 column (GE-Healthcare) pre-equilibrated with 150mM NaCl, tris/acetate buffer pH 7.5, 10 mM DTT was calibrated with standard proteins (669; 440; 75; 29 and 6.5 kD) and dextran blue. The determination of a partition coefficient ( $K_{av}$ ) of 0.2 suggests an apparent molecular weight of the cation dependent activity estimated at 247 kD.

MLMGDESMNPQVWPGNPNYHLGAKWDGQGTFALYSENATTVELCFFDRQNQETRIP  
LTEVQNYVWHAYLPGIMPQQRYGYRVDGVDPEEGHRFNVNKLLIDPYAKALDGEIGF  
GEPFIGYVWEDEDEDISFSELD SAHLVPAVVVDESFDWEGDKPLDIPEHETIYELHVK  
GFTKLHPDIPEDLRGTFAGLAHPSTIVYLKSLGITAIELMPIHHFLSQPGHLVEKDLTNY  
WGYDSISYLAPFSGYCATKTPQDQVKEFKAMVKALHQEGIEVIMDVVYNHTGEGNHFG  
PTLSLRGIDNATYYRVVEEDPRYYMDFTGCGNSLNLKHPQVMKLIMDSLRYWVLEMH  
VDGFRFDLAAALARELLEVDCLATFFDIIHQDPVLSNIKLI AEPWDIGEDGYHVGKFPVL  
WSEWNGR YRDTVRNFWRGEKSILAEFAYRVTGSSDLYQDNGRTPSASINFITAH DGFT  
LNDLVSYNHKKHNDANGEENKDGEQFNHSWNCGEEGDSKDPEVLSLRNQQRRNFLVTL  
MLSQGVPM LTAGDEIGRTQKGNNNAFCQDNEISWVDWSLEHKNAELLKFVRDLIDLR  
HQHPVFRRRKWFQGGQDIHGSGVSDIGWFNPDGFVTAETQWNLGFAKAIALFLNGQEI  
PLKDQQGQRVVDNSFLLFFNAHYEAIEFVIPESLGKQDWIMVIDTTQSRLLLES GKRYRH  
DVS IKVEARSLVVLKTTN Stop

**Supplemental figure 5: Identification of debranching enzyme activity.**

Identification of a cation dependent activity by Nano-LC-MS-MS. NCBI blast search identifies seven trypsinic peptides common in GlgX proteins (underlined peptides). In addition, three trypsinic peptides match specifically with CLg1-GlgX2 (bold underlined peptides) and not with CLg1-GlgX1. These data suggest that the cation dependent activity is probably an homotrimeric or homodimeric complex of GlgX2 (see text).

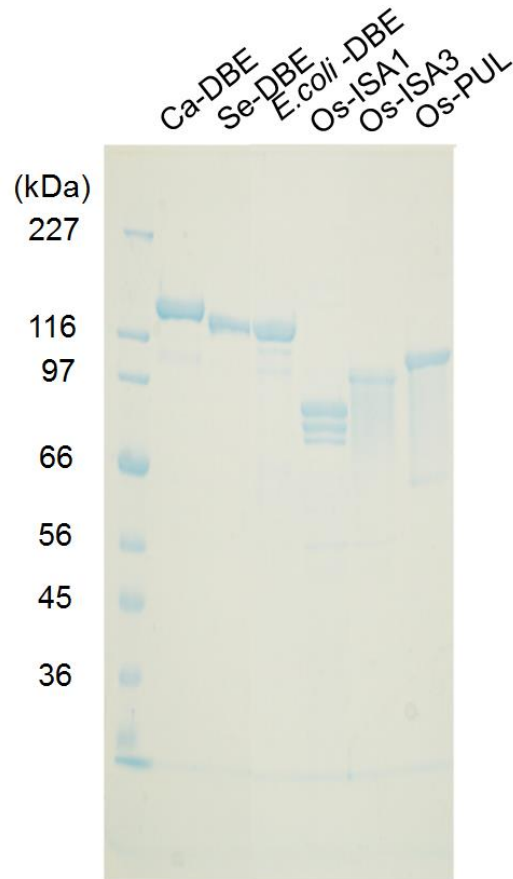

**Supplemental figure 6: SDS-PAGE of purified DBE preparations from rice, cyanobacteria and *E.coli*.**

The Ca-DBE (DBE from *Cyanothece* ATCC51142), Se-DBE (DBE from *Synechococcus elongatus* PCC7942) and *E.coli* GlgX were expressed in the form of the trigger factor fusion protein, while OsISA3 (ISA3 from rice) was fused with the thioredoxin tag. The Os-ISA1 (ISA1 from rice) and Os-PUL (PUL from rice) were connected with the His tag. The actual molecular sizes of Os-ISA1, Os-ISA3, Os-PUL, Ca-DBE, Se-DBE and *E.coli* GlgX were calculated to be 84,136, 80,517, 99,166, 80,332, 78,956 and 66,953 Da, respectively. Since all the 3 OsISA1 protein bands were reacted with antibody raised against completely purified Os-ISA1 protein, these bands were considered to be derived from the Os-ISA1 protein, possibly by production from the multiple translation-starting positions. Each purified DBE preparation including about 1.0  $\mu\text{g}$  of protein was loaded onto the SDS-PAGE gel. Molecular mass was indicated in the figure as kDa.

| activity                  | gene             | Strains |      |       |        |         |
|---------------------------|------------------|---------|------|-------|--------|---------|
|                           |                  | 80D5    | 99A7 | 118H9 | 153H12 | 175 E12 |
| Debranching enzymes       | <i>glgX2</i>     | -       | -    | -     | -      | -       |
|                           | <i>iDBE</i>      | -       | -    | -     | -      | -       |
|                           | <i>apu GH13</i>  | -       | N.D. | -     | -      | -       |
|                           | <i>apu GH57</i>  | -       | -    | -     | N.D.   | -       |
| Branching Enzymes         | <i>glgB1</i>     | -       | N.D. | -     | -      | -       |
|                           | <i>glgB2</i>     | N.D.    | -    | -     | -      | -       |
|                           | <i>glgB3</i>     | -       | -    | -     | -      | -       |
|                           | <i>glgB GH57</i> | N.D.    | -    | -     | -      | -       |
| Starch synthases          | <i>glgA1</i>     | -       | -    | -     | -      | -       |
|                           | <i>glgA2</i>     | -       | -    | -     | N.D.   | -       |
|                           | <i>gbss</i>      | -       | -    | -     | -      | -       |
| Phosphorylase             | <i>pho</i>       | N.D.    | N.D. | -     | N.D.   | -       |
| a-1,4 glucano transferase | <i>malQ</i>      | -       | -    | -     | -      | -       |

**Supplemental table 1: Summary table of starch metabolizing genes checked for mutations.**

Molecular cloning and sequencing of genes involved in starch metabolism pathway in five class A mutants. Primers used sequenced the others gene coding branching enzyme, of the GH13 family (*glgB1*, and *glgB2*) and of the GH 57 family (*glgB57*), and the others gene coding debranching enzyme: the indirect debranching enzyme (*iDBE*) and the both amylopullanase of the GH 13 family (*apu13*) and the GH57 family (*apu57*). This table shows no others mutation in the different gene of the class A mutant.

| Gene                        | Primer                  | 5'-Sequence-3'                | Temperature of hybridation |
|-----------------------------|-------------------------|-------------------------------|----------------------------|
| Amylopullulanase            | apu13 Cloning For       | GCATCCATATTAATAATGATCGCTAAGG  | 56.6°C                     |
|                             | apu13 Cloning Rev       | TTCGTCCTTCGTCCTCCTGTCCTT      |                            |
|                             | apu13 Sequencing 1      | GGTAATCGAGCTTTACCGAAAT        | 58.6°C                     |
|                             | apu13 Sequencing 2      | TCAAGATCTTCTCCTGCTACCGTTA     |                            |
|                             | apu13 Sequencing 3      | CAGCTAACCCAGTTAAATTTACTTGC    |                            |
|                             | apu13 Sequencing 4      | GATTGAATTTCCGGTAAAGCTCGAT     |                            |
|                             | Apu57 Cloning For       | GGAGATCTTCTGCCCCCTCTTCA       |                            |
|                             | Apu57 Cloning Rev       | AAAATAGCCAATAAACAGAAGCGA      |                            |
|                             | Apu57 Sequencing 1      | ACGAACTGCGAACCCAGAACTCC       |                            |
|                             | Apu57 Sequencing 2      | ACCCAATCCCCTGCCTTCGCAT        |                            |
|                             | Apu57 Sequencing 3      | GGCATATCAAAGGTAAGTACTCGTCATGG |                            |
|                             | Apu57 Sequencing 4      | AGGTAAAGACAGGGGCTGTCAA        |                            |
| Indirect debranching enzyme | idbe Cloning For        | TCAATTATAAGTAGGGGTAGGAGA      | 55.9°C                     |
|                             | idbe Cloning Rev        | ATGCTGAAAAAATCGTCCAAA         |                            |
|                             | idbe Sequencing 1       | CACAACTCTGATAACAGCCTCAA       |                            |
|                             | idbe Sequencing 2       | GTACACCTGACTCACCACCGTAA       |                            |
|                             | idbe Sequencing 4       | ACCGCCTAGATAATGAGATTGGAT      |                            |
| Branching enzyme            | glgB3 Cloning Rev       | TGACCATCCCATTGGCTCCTA         | 61°C                       |
|                             | glgB3 Cloning For       | AGTGAATAGCCAAAAATCAACGAT      |                            |
|                             | glgB3 Sequencing 1      | GTGGTTTAGGCAACTACGACGGTACA    |                            |
|                             | glgB3 Sequencing 2      | CGTTACGTATCATGGAACTAATTT      |                            |
|                             | glgB3 Sequencing 3      | CCAGGTGCGCCGATGATTTT          | 60°C                       |
|                             | glgB3 Sequencing 4      | TCGCCCCTGAATGATGATATAAAT      |                            |
|                             | glgB2 Cloning For       | TGCGAAAAGATGTCTTGCTATGCT      |                            |
|                             | glgB2 Cloning Rev       | TCCACTCAGTCAAGTGTGAATCAA      |                            |
|                             | glgB2 Sequencing 1      | TTTTGACGGCTCATGGGGTTA         |                            |
|                             | glgB2 Sequencing 2      | ATTGTGATAGTTCGGGCGCTCAT       | 60.4°C                     |
|                             | glgB2 Sequencing 3      | AGCGCCCGAACTATCACAAT          |                            |
|                             | glgB2 Sequencing 4      | ACCATAGCGGGAAGTTGGTG          |                            |
|                             | glgB1 Cloning For       | TGAAACAGTCAGACAAGTTTTCCGT     |                            |
|                             | glgB1 Cloning Rev       | TCCCGAACTGAGGTTAAGTATTGA      | 59°C                       |
|                             | glgB1 Sequencing 1      | CACCTCGTTCTTGCTACA            |                            |
|                             | glgB1 Sequencing 2      | TGCATCCAGCCCATATTCCA          |                            |
|                             | glgB1 Sequencing 3      | TCGCAGAAGAATCAACCGCTTGGT      |                            |
|                             | glgB1 Sequencing 4      | TGTAGCCAAGAACCGAGGTGT         |                            |
|                             | glgB57 Cloning For      | CGCCATTAGACTCTGCTAGG          |                            |
| glgB57 Cloning Rev          | TGGAGTTGTGGTTTCTTCTGTCA |                               |                            |
| glgB57 Sequencing 1         | TGCGGTTATTACGGTGGCTT    |                               |                            |
| glgB57 Sequencing 2         | TAGCTAAACCCGCAGCATCG    |                               |                            |
| glgB57 Sequencing 3         | AACCAAATCCCTCTGGGAGCAA  |                               |                            |
| glgB57 Sequencing 4         | GAGCTTGCTTGTCGGCTAGT    |                               |                            |
| Debranching enzyme          | glgX2 Cloning For       | ATGTTAATGGGAGATGAATCTATGA     | 59.6°C                     |
|                             | glgX2 Cloning Rev       | TAATTAGTGGTTTTTAGTACTACTAACG  |                            |
|                             | glgX2 Sequencing 1      | AGCAGTGGTAGTCGACGAATCT        |                            |
|                             | glgX2 Sequencing 2      | ACGTCGTTGCTGATTGCGTA          |                            |
|                             | glgX2 Sequencing 4      | AAGCCGGCAAATGTTCTCTCGTA       |                            |



|                 |                                                                                                                                                                                                                                                                                                                                                  |                                                                                                                                                                                                                                                                                                                                                                                                                                                                                                        |                                                                          |
|-----------------|--------------------------------------------------------------------------------------------------------------------------------------------------------------------------------------------------------------------------------------------------------------------------------------------------------------------------------------------------|--------------------------------------------------------------------------------------------------------------------------------------------------------------------------------------------------------------------------------------------------------------------------------------------------------------------------------------------------------------------------------------------------------------------------------------------------------------------------------------------------------|--------------------------------------------------------------------------|
|                 | glgX1 Cloning For<br>glgX1 Cloning Rev<br>glgX1 Sequencing 1<br>glgX1 Sequencing 2<br>glgX1 Sequencing 3<br>glgX1 Sequencing 4                                                                                                                                                                                                                   | ATGAACCATAAAAACGTTACCTG<br>CTATTTTGCCATTAATAAAATGCAAC<br>TCGGATTCCTCTTGCTTCAACCGT<br>TCATCGGTGTAGCTTGAGCGAGT<br>CCACGATGGGGTGCAAAGAAACT<br>ATGAAGCTAATGGTGAAGAGAACCGA                                                                                                                                                                                                                                                                                                                                  | 59.1°C                                                                   |
| Starch synthase | GBSS Cloning For<br>GBSS Cloning Rev<br>GBSS Sequencing 1<br>GBSS Sequencing 2<br>GBSS Sequencing 3<br>GBSS Sequencing 4<br>glgA1 Cloning For<br>glgA1 Cloning Rev<br>glgA1 Sequencing 1<br>glgA1 Sequencing 2<br>glgA2 Cloning For<br>glgA2 Cloning Rev<br>glgA2 Sequencing 1<br>glgA2 Sequencing 2<br>glgA2 Sequencing 3<br>glgA2 Sequencing 4 | TCCTCATGAATTGGTGACATAGTATGTT<br>CAGATACAGGTGAAAATCGTAACGC<br>AAAACGCCCCTGGAAAGCAATA<br>GCAATAGTCAGCACCAGCCGTGATA<br>TTTATCACGGCTGGTGCTGACT<br>ATGTTAAACATTTGCTTTGTCTCTACGGAA<br>AATTGTTAACAAAGTGGGGAGAGAAA<br>GATAACGATCGTGATAACTTTTAAGGTA<br>GCTCTGCAACATATGACTTGGTGTCTGTA<br>CCATAATAACGAGCCGCAAATTCTGCTA<br>AAGTGAATCAACTGAATGAAAACGA<br>CGGGTATCTGTAATCTAGAACTCCTCA<br>ATGATTGGCAAACCTGGATTGATCCCTGTA<br>ACCACCAACACGAACTACAGGTACT<br>TTAAACGGAATTGATTACAATACTTGGGA<br>GATTGGAATAGACAATACCACCTTTCA | 59.6°C<br><br><br><br><br><br><br>60°C<br><br><br><br><br><br><br>59.8°C |
|                 | Phosphorylase Cloning For<br>Phosphorylase Cloning Rev<br>Phosphorylase Sequencing 1<br>Phosphorylase Sequencing 2<br>Phosphorylase Sequencing 3<br>Phosphorylase Sequencing 4<br>Phosphorylase Sequencing 5<br>Phosphorylase Sequencing 6                                                                                                       | GCTTACTAAGACGAAATTGATTATGAGCGAT<br>TTCACCGTAACGCTATCAGCCGTAAT<br>TTAGGTAACGGTGGTTTGGGAA<br>CCAAAGATAAAGGTGCGGGGATA<br>CTTCTTCTAGAAGATATTCGTTTCATGGTA<br>GAGTTTGTGTGTAATCGACCACGCTT<br>AACTCTTGACGGTGCCAATATTGA<br>CTA AACCTGGATCTGGCTCTTCTT                                                                                                                                                                                                                                                            | 62°C                                                                     |
|                 | MalQ Cloning For<br>MalQ Cloning Rev<br>MalQ Sequencing 1<br>MalQ Sequencing 2<br>MalQ Sequencing 3<br>MalQ Sequencing 4                                                                                                                                                                                                                         | CGCAGGTCCTGTGATTGTCT<br>CCATCTACCGGTAACGCTGTAA<br>CTT CAGCGACAATCGGCAACT<br>CCACGATCGGTTGGTTTGATA<br>TGTTGGATGACTACGCTCTGT<br>TGCAAATACCCCTTTGATGCT                                                                                                                                                                                                                                                                                                                                                    | 62°C                                                                     |

**Supplemental table 2: List of primers used for genes cloning and sequencing of genes involved in the storage polysaccharide metabolism of *Cyanobacterium* sp. CLg1.**

**Supplemental methods 1: Parameter values for phylogenetic analysis**

Determination of Best fit model according to ProtTest 3.2 for the alignment, of GlgX of bacteria and Archaeplastida isoamylase.

This determination was performed with:

- “-all-distribution” parameters including models with rate variation among sites, number of categories and both.
- “-F” parameters including models with empirical frequency estimation.
- “-AIC” parameters displaying model sorted by the Akaike Information Criterion.
- “-S 2” parameters using the optimizing strategy developed for Maximum Likelihood analysis.

**Results:**

\*\*\*\*\*

**AKAIKE INFORMATION CRITERION**

\*\*\*\*\*

\*\*\*\*\*

Best model according to AIC: LG+G

Confidence Interval: 100.0

\*\*\*\*\*

| Model          | deltaAIC | AIC       | AICw | -lnL     |
|----------------|----------|-----------|------|----------|
| LG+G           | 0.00     | 170602.28 | 0.70 | 85051.14 |
| LG+I+G         | 1.68     | 170603.96 | 0.30 | 85050.98 |
| LG+G+F         | 173.72   | 170776.00 | 0.00 | 85119.00 |
| LG+I+G+F       | 174.89   | 170777.18 | 0.00 | 85118.59 |
| WAG+G          | 663.83   | 171266.12 | 0.00 | 85383.06 |
| WAG+I+G        | 665.67   | 171267.96 | 0.00 | 85382.98 |
| RtREV+I+G+F    | 848.35   | 171450.63 | 0.00 | 85455.32 |
| RtREV+G+F      | 850.47   | 171452.76 | 0.00 | 85457.38 |
| WAG+G+F        | 890.11   | 171492.39 | 0.00 | 85477.20 |
| WAG+I+G+F      | 891.55   | 171493.84 | 0.00 | 85476.92 |
| VT+G           | 988.07   | 171590.36 | 0.00 | 85545.18 |
| VT+I+G         | 988.83   | 171591.11 | 0.00 | 85544.56 |
| VT+G+F         | 1251.84  | 171854.12 | 0.00 | 85658.06 |
| VT+I+G+F       | 1252.15  | 171854.43 | 0.00 | 85657.22 |
| Blosum62+G     | 1582.98  | 172185.27 | 0.00 | 85842.63 |
| Blosum62+I+G   | 1583.76  | 172186.05 | 0.00 | 85842.02 |
| RtREV+I+G      | 1707.47  | 172309.75 | 0.00 | 85903.87 |
| RtREV+G        | 1709.75  | 172312.03 | 0.00 | 85906.02 |
| Blosum62+I+G+F | 1846.25  | 172448.53 | 0.00 | 85954.27 |
| Blosum62+G+F   | 1846.52  | 172448.80 | 0.00 | 85955.40 |
| CpREV+G+F      | 1940.10  | 172542.38 | 0.00 | 86002.19 |
| CpREV+I+G+F    | 1942.06  | 172544.34 | 0.00 | 86002.17 |
| CpREV+G        | 2034.40  | 172636.69 | 0.00 | 86068.34 |
| CpREV+I+G      | 2036.41  | 172638.70 | 0.00 | 86068.35 |
| JTT+G          | 2129.92  | 172732.20 | 0.00 | 86116.10 |
| JTT+I+G        | 2131.09  | 172733.37 | 0.00 | 86115.69 |
| JTT+G+F        | 2571.15  | 173173.43 | 0.00 | 86317.71 |
| JTT+I+G+F      | 2572.57  | 173174.85 | 0.00 | 86317.43 |

|               |          |           |      |          |
|---------------|----------|-----------|------|----------|
| DCMut+G       | 3449.82  | 174052.10 | 0.00 | 86776.05 |
| Dayhoff+G     | 3451.65  | 174053.93 | 0.00 | 86776.97 |
| DCMut+I+G     | 3451.76  | 174054.04 | 0.00 | 86776.02 |
| Dayhoff+I+G   | 3453.60  | 174055.89 | 0.00 | 86776.94 |
| DCMut+G+F     | 3638.15  | 174240.43 | 0.00 | 86851.22 |
| Dayhoff+G+F   | 3638.78  | 174241.06 | 0.00 | 86851.53 |
| DCMut+I+G+F   | 3640.09  | 174242.37 | 0.00 | 86851.19 |
| Dayhoff+I+G+F | 3640.74  | 174243.02 | 0.00 | 86851.51 |
| MtREV+G+F     | 4338.60  | 174940.89 | 0.00 | 87201.44 |
| MtREV+I+G+F   | 4340.54  | 174942.82 | 0.00 | 87201.41 |
| FLU+I+G+F     | 5672.13  | 176274.42 | 0.00 | 87867.21 |
| FLU+G+F       | 5672.83  | 176275.11 | 0.00 | 87868.55 |
| MtArt+I+G+F   | 6601.29  | 177203.57 | 0.00 | 88331.78 |
| MtArt+G+F     | 6605.84  | 177208.13 | 0.00 | 88335.06 |
| FLU+G         | 6723.16  | 177325.45 | 0.00 | 88412.72 |
| FLU+I+G       | 6724.20  | 177326.48 | 0.00 | 88412.24 |
| HIVb+I+G      | 7423.14  | 178025.43 | 0.00 | 88761.71 |
| HIVb+G        | 7428.28  | 178030.56 | 0.00 | 88765.28 |
| HIVb+I+G+F    | 7671.82  | 178274.10 | 0.00 | 88867.05 |
| HIVb+G+F      | 7675.66  | 178277.94 | 0.00 | 88869.97 |
| MtMam+G+F     | 9375.19  | 179977.47 | 0.00 | 89719.74 |
| MtMam+I+G+F   | 9377.24  | 179979.53 | 0.00 | 89719.76 |
| VT+I          | 9499.48  | 180101.77 | 0.00 | 89800.88 |
| WAG+I         | 9505.33  | 180107.61 | 0.00 | 89803.80 |
| WAG           | 9619.70  | 180221.99 | 0.00 | 89861.99 |
| VT            | 9637.06  | 180239.35 | 0.00 | 89870.67 |
| MtREV+G       | 9651.66  | 180253.95 | 0.00 | 89876.97 |
| MtREV+I+G     | 9652.93  | 180255.22 | 0.00 | 89876.61 |
| LG+I          | 9707.67  | 180309.95 | 0.00 | 89904.97 |
| VT+I+F        | 9732.05  | 180334.33 | 0.00 | 89898.16 |
| WAG+I+F       | 9774.08  | 180376.37 | 0.00 | 89919.18 |
| LG            | 9840.27  | 180442.55 | 0.00 | 89972.28 |
| VT+F          | 9873.45  | 180475.73 | 0.00 | 89969.87 |
| WAG+F         | 9892.92  | 180495.20 | 0.00 | 89979.60 |
| LG+I+F        | 9987.22  | 180589.51 | 0.00 | 90025.75 |
| Blosum62+I    | 10021.91 | 180624.20 | 0.00 | 90062.10 |
| LG+F          | 10127.76 | 180730.04 | 0.00 | 90097.02 |
| Blosum62      | 10152.81 | 180755.10 | 0.00 | 90128.55 |
| Blosum62+I+F  | 10218.61 | 180820.90 | 0.00 | 90141.45 |
| Blosum62+F    | 10356.99 | 180959.28 | 0.00 | 90211.64 |
| RtREV+I+F     | 10470.84 | 181073.12 | 0.00 | 90267.56 |
| RtREV+F       | 10606.43 | 181208.71 | 0.00 | 90336.36 |
| RtREV+I       | 11092.73 | 181695.01 | 0.00 | 90597.50 |
| RtREV         | 11208.58 | 181810.87 | 0.00 | 90656.43 |
| CpREV+I+F     | 11320.79 | 181923.08 | 0.00 | 90692.54 |
| CpREV+I       | 11340.27 | 181942.56 | 0.00 | 90721.28 |
| CpREV+F       | 11426.95 | 182029.24 | 0.00 | 90746.62 |
| CpREV         | 11437.57 | 182039.85 | 0.00 | 90770.93 |
| JTT+I         | 11559.32 | 182161.61 | 0.00 | 90830.80 |
| JTT           | 11706.03 | 182308.32 | 0.00 | 90905.16 |

|             |          |           |      |           |
|-------------|----------|-----------|------|-----------|
| JTT+I+F     | 12008.62 | 182610.91 | 0.00 | 91036.45  |
| MtArt+I+G   | 12126.46 | 182728.74 | 0.00 | 91113.37  |
| MtArt+G     | 12129.83 | 182732.12 | 0.00 | 91116.06  |
| JTT+F       | 12159.34 | 182761.63 | 0.00 | 91112.81  |
| DCMut+I     | 13201.66 | 183803.94 | 0.00 | 91651.97  |
| Dayhoff+I   | 13224.06 | 183826.34 | 0.00 | 91663.17  |
| DCMut       | 13337.48 | 183939.77 | 0.00 | 91720.88  |
| Dayhoff     | 13359.50 | 183961.78 | 0.00 | 91731.89  |
| DCMut+I+F   | 13560.91 | 184163.20 | 0.00 | 91812.60  |
| Dayhoff+I+F | 13583.06 | 184185.34 | 0.00 | 91823.67  |
| DCMut+F     | 13700.54 | 184302.82 | 0.00 | 91883.41  |
| Dayhoff+F   | 13722.27 | 184324.56 | 0.00 | 91894.28  |
| HIVw+I+G+F  | 13850.90 | 184453.19 | 0.00 | 91956.59  |
| HIVw+G+F    | 13857.70 | 184459.99 | 0.00 | 91960.99  |
| MtMam+G     | 14665.21 | 185267.49 | 0.00 | 92383.75  |
| MtMam+I+G   | 14666.65 | 185268.93 | 0.00 | 92383.46  |
| MtREV+I+F   | 15727.32 | 186329.60 | 0.00 | 92895.80  |
| MtREV+F     | 15807.24 | 186409.52 | 0.00 | 92936.76  |
| FLU+I+F     | 16465.01 | 187067.30 | 0.00 | 93264.65  |
| HIVw+I+G    | 16496.88 | 187099.16 | 0.00 | 93298.58  |
| HIVw+G      | 16498.39 | 187100.67 | 0.00 | 93300.34  |
| FLU+F       | 16619.53 | 187221.81 | 0.00 | 93342.91  |
| FLU+I       | 17571.87 | 188174.16 | 0.00 | 93837.08  |
| FLU         | 17712.25 | 188314.53 | 0.00 | 93908.27  |
| HIVb+I      | 19181.53 | 189783.81 | 0.00 | 94641.91  |
| HIVb        | 19375.83 | 189978.12 | 0.00 | 94740.06  |
| HIVb+I+F    | 19810.57 | 190412.86 | 0.00 | 94937.43  |
| HIVb+F      | 20004.11 | 190606.39 | 0.00 | 95035.20  |
| MtArt+I+F   | 21099.55 | 191701.83 | 0.00 | 95581.91  |
| MtArt+F     | 21245.59 | 191847.87 | 0.00 | 95655.94  |
| MtREV+I     | 22657.05 | 193259.33 | 0.00 | 96379.67  |
| MtREV       | 22738.64 | 193340.93 | 0.00 | 96421.46  |
| MtMam+I+F   | 24440.36 | 195042.65 | 0.00 | 97252.32  |
| MtMam+F     | 24528.71 | 195131.00 | 0.00 | 97297.50  |
| HIVw+I+F    | 25476.13 | 196078.41 | 0.00 | 97770.21  |
| HIVw+F      | 25690.42 | 196292.71 | 0.00 | 97878.35  |
| HIVw+I      | 27881.13 | 198483.42 | 0.00 | 98991.71  |
| HIVw        | 28055.00 | 198657.29 | 0.00 | 99079.64  |
| MtArt+I     | 30144.63 | 200746.91 | 0.00 | 100123.46 |
| MtArt       | 30307.92 | 200910.21 | 0.00 | 100206.10 |
| MtMam+I     | 33032.04 | 203634.32 | 0.00 | 101567.16 |
| MtMam       | 33117.07 | 203719.35 | 0.00 | 101610.68 |

\*\*\*\*\*

#### Relative importance of parameters

\*\*\*\*\*

alpha (+G): 0.698  
 p-inv (+I): 0.000  
 alpha+p-inv (+I+G): 0.302

freqs (+F): 0.000

\*\*\*\*\*

Model-averaged estimate of parameters

\*\*\*\*\*

alpha (+G): 0.974  
p-inv (+I): NaN  
alpha (+I+G): 0.980  
p-inv (+I+G): 0.001

Determination of the Maximum Likelihood (ML) tree

In order to determine the ML tree, RAxML was performed as follow:

- “-N 1000” parameter indicating 1000 bootstrap repeat
- “-m PROTGAMMALG” : the substitution model performed was LG+G
- “-p 123456” indicating 6 parsimony Random Seed
- “-x 123456” indicating 6 rapid Bootstrap Random Seed
- “-f a” indicating that RAxML was instructed to conduct a rapid Bootstrap analysis and look for the best-scoring ML tree in one single program run.

The tree obtained was rooted on the branch uniting the Archaeplastida sequences. This was done to reflect our current understanding that supports Archaeplastida monophyly.
